# Supplementary material for: Qing-Yi Decoction in the Treatment of Acute Pancreatitis: An Integrated Approach Based on Chemical Profile, Network Pharmacology, Molecular Docking and Experimental Evaluation
Source: Front Pharmacol. 2021 Apr 29;12:590994. doi: 10.3389/fphar.2021.590994 (PMC8117095; doi:10.3389/fphar.2021.590994)
Supplement: Supplementary file 1 [file Table2.xlsx]

## Sheet: Sheet1
Components	Targets
Chrysophanol	BCL2
Chrysophanol	CA7
Chrysophanol	CALM
Chrysophanol	CISD1
Chrysophanol	CSNK2A1
Chrysophanol	CYP19A1
Chrysophanol	EGFR
Chrysophanol	ELANE
Chrysophanol	ESR1
Chrysophanol	ESR2
Chrysophanol	FNTA
Chrysophanol	FNTB
Chrysophanol	FTO
Chrysophanol	GABRA1
Chrysophanol	IGHG1
Chrysophanol	LCK
Chrysophanol	MCL1
Chrysophanol	NCOA2
Chrysophanol	PDE3A
Chrysophanol	PIK3CG
Chrysophanol	PIM1
Chrysophanol	PKIA
Chrysophanol	PTGS1
Chrysophanol	PTGS2
Chrysophanol	PTP4A3
Chrysophanol	SCN5A
tryptophane	ADRA2A
tryptophane	ADRB1
tryptophane	ANPEP
tryptophane	HTR1A
tryptophane	HTR1B
tryptophane	HTR1D
tryptophane	HTR1E
tryptophane	HTR2A
tryptophane	HTR2B
tryptophane	HTR2C
tryptophane	HTR6
tryptophane	HTR7
tryptophane	IDO1
tryptophane	SLC6A3
tryptophane	TACR1
3,5-dicaffeoylquinic acid/3,4-dicaffeoylquinic acid	AKR1B1
3,5-dicaffeoylquinic acid/3,4-dicaffeoylquinic acid	AKR1B10
3,5-dicaffeoylquinic acid/3,4-dicaffeoylquinic acid	APP
3,5-dicaffeoylquinic acid/3,4-dicaffeoylquinic acid	CA12
3,5-dicaffeoylquinic acid/3,4-dicaffeoylquinic acid	CA13
3,5-dicaffeoylquinic acid/3,4-dicaffeoylquinic acid	CA4
3,5-dicaffeoylquinic acid/3,4-dicaffeoylquinic acid	CA5B
3,5-dicaffeoylquinic acid/3,4-dicaffeoylquinic acid	CA6
3,5-dicaffeoylquinic acid/3,4-dicaffeoylquinic acid	CA7
3,5-dicaffeoylquinic acid/3,4-dicaffeoylquinic acid	MMP12
3,5-dicaffeoylquinic acid/3,4-dicaffeoylquinic acid	MMP13
3,5-dicaffeoylquinic acid/3,4-dicaffeoylquinic acid	MMP2
3,5-dicaffeoylquinic acid/3,4-dicaffeoylquinic acid	PRKCA
3,5-dicaffeoylquinic acid/3,4-dicaffeoylquinic acid	PRKCD
3,5-dicaffeoylquinic acid/3,4-dicaffeoylquinic acid	PYGL
3,5-di-O-caffeoyl-4-O-(3-hydroxy-3-methyl)- glutaroylquinic acid	ACE
3,5-di-O-caffeoyl-4-O-(3-hydroxy-3-methyl)- glutaroylquinic acid	ADK
3,5-di-O-caffeoyl-4-O-(3-hydroxy-3-methyl)- glutaroylquinic acid	ADORA3
3,5-di-O-caffeoyl-4-O-(3-hydroxy-3-methyl)- glutaroylquinic acid	AGTR2
3,5-di-O-caffeoyl-4-O-(3-hydroxy-3-methyl)- glutaroylquinic acid	AKR1B1
3,5-di-O-caffeoyl-4-O-(3-hydroxy-3-methyl)- glutaroylquinic acid	AKR1B10
3,5-di-O-caffeoyl-4-O-(3-hydroxy-3-methyl)- glutaroylquinic acid	ANPEP
3,5-di-O-caffeoyl-4-O-(3-hydroxy-3-methyl)- glutaroylquinic acid	APP
3,5-di-O-caffeoyl-4-O-(3-hydroxy-3-methyl)- glutaroylquinic acid	BACE1
3,5-di-O-caffeoyl-4-O-(3-hydroxy-3-methyl)- glutaroylquinic acid	BCHE
3,5-di-O-caffeoyl-4-O-(3-hydroxy-3-methyl)- glutaroylquinic acid	CA1
3,5-di-O-caffeoyl-4-O-(3-hydroxy-3-methyl)- glutaroylquinic acid	CHIA
3,5-di-O-caffeoyl-4-O-(3-hydroxy-3-methyl)- glutaroylquinic acid	ENPEP
3,5-di-O-caffeoyl-4-O-(3-hydroxy-3-methyl)- glutaroylquinic acid	FGF2
3,5-di-O-caffeoyl-4-O-(3-hydroxy-3-methyl)- glutaroylquinic acid	NPPA
4-Hydroxybenzoic acid	ADH1B
4-Hydroxybenzoic acid	ADH1C
4-Hydroxybenzoic acid	CA1
4-Hydroxybenzoic acid	CA12
4-Hydroxybenzoic acid	CA13
4-Hydroxybenzoic acid	CA14
4-Hydroxybenzoic acid	CA2
4-Hydroxybenzoic acid	CA3
4-Hydroxybenzoic acid	CA4
4-Hydroxybenzoic acid	CA5A
4-Hydroxybenzoic acid	CA5B
4-Hydroxybenzoic acid	CA6
4-Hydroxybenzoic acid	CA7
4-Hydroxybenzoic acid	CA9
4-Hydroxybenzoic acid	DAO
4-Hydroxybenzoic acid	FUT7
4-Hydroxybenzoic acid	MAOA
4-Hydroxybenzoic acid	MAOB
4-Hydroxybenzoic acid	PLA2G2E
4-Hydroxybenzoic acid	SRD5A2
Acteoside	AKR1B1
Acteoside	AKR1B10
Acteoside	APP
Acteoside	CD22
Acteoside	FYN
Acteoside	HCAR2
Acteoside	HRAS
Acteoside	HSP90AA1
Acteoside	ICAM1
Acteoside	IMPDH2
Acteoside	MMP12
Acteoside	MMP13
Acteoside	MMP2
Acteoside	PRKCA
Acteoside	PRSS1
Acteoside	PTPRC
Acteoside	TTR
adenosine	ADA
adenosine	ADK
adenosine	ADORA1
adenosine	ADORA2A
adenosine	ADORA3
adenosine	AHCY
adenosine	DPP4
adenosine	EGFR
adenosine	EHMT1
adenosine	EHMT2
adenosine	GAPDH
adenosine	HSPA5
adenosine	HSPA8
adenosine	MCL1
adenosine	SETD7
Albiflorin	ABCB1
Albiflorin	ADORA2A
Albiflorin	ADORA2B
Albiflorin	ADORA3
Albiflorin	HSP90AA1
Albiflorin	HSPA5
Albiflorin	HSPA8
Albiflorin	LGALS3
Albiflorin	LGALS9
Albiflorin	MMP13
Albiflorin	PPM1A
Albiflorin	PRKCA
Albiflorin	PTAFR
Albiflorin	SELP
Albiflorin	SLC29A1
Allocryptopine	ADRA1A
Allocryptopine	ADRA1B
Allocryptopine	ADRA1D
Allocryptopine	ADRB2
Allocryptopine	CACNA1S
Allocryptopine	CALM
Allocryptopine	CDC7
Allocryptopine	CDK2
Allocryptopine	CCNA1
Allocryptopine	CCNA2
Allocryptopine	CHRM1
Allocryptopine	CHRM3
Allocryptopine	CHRM4
Allocryptopine	CHRM5
Allocryptopine	DRD1
Allocryptopine	DRD2
Allocryptopine	DRD3
Allocryptopine	DRD4
Allocryptopine	EGFR
Allocryptopine	F3
Allocryptopine	F7
Allocryptopine	FLT2
Allocryptopine	HTR1A
Allocryptopine	HTR2A
Allocryptopine	HTR2C
Allocryptopine	HTR3A
Allocryptopine	HTR7
Allocryptopine	KCNH2
Allocryptopine	KCNMA1
Allocryptopine	LRRK2
Allocryptopine	NCOA1
Allocryptopine	OPRD1
Allocryptopine	OPRM1
Allocryptopine	PDE10A
Allocryptopine	PDE3A
Allocryptopine	PTGS1
Allocryptopine	PTGS2
Allocryptopine	SCN5A
Allocryptopine	SLC6A3
Allocryptopine	SLC6A4
Aloe-emodin	AKR1B1
Aloe-emodin	BAX
Aloe-emodin	CASP3
Aloe-emodin	CCNB1
Aloe-emodin	CDKN1A
Aloe-emodin	EIF6
Aloe-emodin	IGHG1
Aloe-emodin	IL1B
Aloe-emodin	MYC
Aloe-emodin	NCOA2
Aloe-emodin	PCNA
Aloe-emodin	PIK3CG
Aloe-emodin	PKIA
Aloe-emodin	PRKCA
Aloe-emodin	PRKCD
Aloe-emodin	PRKCE
Aloe-emodin	PTGS1
Aloe-emodin	PTGS2
Aloe-emodin	TNF
Aloe-emodin	TP53
baicalein	ABCB1
baicalein	AHR
baicalein	AKR1B1
baicalein	AKT1
baicalein	ALOX12
baicalein	ALOX15
baicalein	APOD
baicalein	AR
baicalein	BAX
baicalein	BCL2
baicalein	CA12
baicalein	CA4
baicalein	CA7
baicalein	CALM
baicalein	CASP3
baicalein	CCNB1
baicalein	CDK1
baicalein	CDK5R1
baicalein	CDK5
baicalein	CYP19A1
baicalein	CYP1B1
baicalein	DPP4
baicalein	EGLN1
baicalein	FABP5
baicalein	FOS
baicalein	FOSL1
baicalein	FOSL2
baicalein	GRK6
baicalein	HIF1A
baicalein	HSD17B1
baicalein	IGF2
baicalein	KDM4E
baicalein	MMP9
baicalein	MPO
baicalein	NCOA1
baicalein	NCOA2
baicalein	NFATC1
baicalein	NOX5
baicalein	PDE3A
baicalein	PIK3CG
baicalein	PRSS1
baicalein	PTGS1
baicalein	PTGS2
baicalein	RELA
baicalein	TDRD7
baicalein	TP53
baicalein	VEGFA
baicalein	XDH
Baicalein 7-O-β-D-glucoside	ACHE
Baicalein 7-O-β-D-glucoside	ADORA1
Baicalein 7-O-β-D-glucoside	ADRA2C
Baicalein 7-O-β-D-glucoside	AKR1B1
Baicalein 7-O-β-D-glucoside	CA1
Baicalein 7-O-β-D-glucoside	CA12
Baicalein 7-O-β-D-glucoside	CA2
Baicalein 7-O-β-D-glucoside	CA9
Baicalein 7-O-β-D-glucoside	IL2
Baicalein 7-O-β-D-glucoside	NMUR2
Baicalein 7-O-β-D-glucoside	NQO2
Baicalein 7-O-β-D-glucoside	PTGS2
Baicalein 7-O-β-D-glucoside	RPS6KA3
Baicalein 7-O-β-D-glucoside	SLC29A1
Baicalein 7-O-β-D-glucoside	TNF
Baicalein 7-O-β-D-glucoside	XDH
Baicalin	ACHE
Baicalin	ADORA1
Baicalin	ADRA2A
Baicalin	ADRA2C
Baicalin	AKR1B1
Baicalin	ALDH2
Baicalin	EGFR
Baicalin	IL2
Baicalin	NMUR2
Baicalin	NOX4
Baicalin	NQO2
Baicalin	PTGS2
Baicalin	RPS6KA3
Baicalin	TNF
Baicalin	XDH
benzoylpaeoniflorin	ADORA2A
benzoylpaeoniflorin	ADORA2B
benzoylpaeoniflorin	ADORA3
benzoylpaeoniflorin	FGF1
benzoylpaeoniflorin	FGF2
benzoylpaeoniflorin	HPSE
benzoylpaeoniflorin	HSP90AA1
benzoylpaeoniflorin	LGALS3
benzoylpaeoniflorin	LGALS9
benzoylpaeoniflorin	SLC6A2
benzoylpaeoniflorin	SSTR1
benzoylpaeoniflorin	SSTR2
benzoylpaeoniflorin	SSTR3
benzoylpaeoniflorin	SSTR4
benzoylpaeoniflorin	VEGFA
berberine	ACHE
berberine	ADRA2B
berberine	ADRA2C
berberine	ADRB2
berberine	AR
berberine	AURKA
berberine	AURKB
berberine	BCHE
berberine	CALM
berberine	CDC42
berberine	CHRM1
berberine	CYP2D6
berberine	DHFR
berberine	ESR1
berberine	HTR2B
berberine	KCNH2
berberine	NCOA2
berberine	NOS2
berberine	NOS3
berberine	PDE10A
berberine	PRSS1
berberine	PTGS1
berberine	PTGS2
berberine	RAC1
berberine	RPS6KB1
berberine	RXRA
berberine	SAE1UBA2
berberine	SCN5A
berberine	SIGMAR1
Carthamidin （4’, 5, 6，7-Tetrahydroxyflavanone）	ABCC1
Carthamidin （4’, 5, 6，7-Tetrahydroxyflavanone）	ABCG2
Carthamidin （4’, 5, 6，7-Tetrahydroxyflavanone）	CA12
Carthamidin （4’, 5, 6，7-Tetrahydroxyflavanone）	CA4
Carthamidin （4’, 5, 6，7-Tetrahydroxyflavanone）	CA7
Carthamidin （4’, 5, 6，7-Tetrahydroxyflavanone）	CBR1
Carthamidin （4’, 5, 6，7-Tetrahydroxyflavanone）	CYP19A1
Carthamidin （4’, 5, 6，7-Tetrahydroxyflavanone）	CYP1B1
Carthamidin （4’, 5, 6，7-Tetrahydroxyflavanone）	ESR1
Carthamidin （4’, 5, 6，7-Tetrahydroxyflavanone）	ESR2
Carthamidin （4’, 5, 6，7-Tetrahydroxyflavanone）	HSD17B1
Carthamidin （4’, 5, 6，7-Tetrahydroxyflavanone）	MAOB
Carthamidin （4’, 5, 6，7-Tetrahydroxyflavanone）	PTGS1
Carthamidin （4’, 5, 6，7-Tetrahydroxyflavanone）	PTGS2
Carthamidin （4’, 5, 6，7-Tetrahydroxyflavanone）	SHBG
Carthamidin （4’, 5, 6，7-Tetrahydroxyflavanone）	TAS2R31
Catechin	CALM
Catechin	CAT
Catechin	ESR1
Catechin	HAS2
Catechin	KLF7
Catechin	NCOA2
Catechin	PPARG
Catechin	PTGS1
Catechin	PTGS2
Catechin	RXRA
chlorogenic acid	AKR1B1
chlorogenic acid	AKR1B10
chlorogenic acid	APP
chlorogenic acid	CA1
chlorogenic acid	CA12
chlorogenic acid	CA2
chlorogenic acid	CA9
chlorogenic acid	MMP12
chlorogenic acid	MMP13
chlorogenic acid	MMP2
chlorogenic acid	NEU4
chlorogenic acid	PRKCA
chlorogenic acid	PRKCD
chlorogenic acid	PTGS2
chlorogenic acid	PYGL
chlorogenic acid	SLC37A4
Chrysin-7-O-glucuronide	ACHE
Chrysin-7-O-glucuronide	ADORA1
Chrysin-7-O-glucuronide	ADRA2A
Chrysin-7-O-glucuronide	ADRA2C
Chrysin-7-O-glucuronide	ADRB1
Chrysin-7-O-glucuronide	AKR1B1
Chrysin-7-O-glucuronide	ALDH2
Chrysin-7-O-glucuronide	CA12
Chrysin-7-O-glucuronide	CA2
Chrysin-7-O-glucuronide	CHRM1
Chrysin-7-O-glucuronide	FDFT1
Chrysin-7-O-glucuronide	IL2
Chrysin-7-O-glucuronide	NMUR2
Chrysin-7-O-glucuronide	NOS1
Chrysin-7-O-glucuronide	NOS2
Chrysin-7-O-glucuronide	NOS3
Chrysin-7-O-glucuronide	NQO2
Chrysin-7-O-glucuronide	PTGS1
Chrysin-7-O-glucuronide	PTGS2
Chrysin-7-O-glucuronide	RPS6KA3
Chrysin-7-O-glucuronide	TNF
Chrysin-7-O-glucuronide	XDH
Cistanoside D	ADORA2A
Cistanoside D	ADORA2B
Cistanoside D	ADORA3
Cistanoside D	CHIA
Cistanoside D	HSP90AA1
Cistanoside D	IMPDH1
Cistanoside D	LGALS4
Cistanoside D	LGALS8
Cistanoside D	MMP12
Cistanoside D	MMP2
Cistanoside D	MMP7
Cistanoside D	MMP8
Cistanoside D	PDE5A
Cistanoside D	PRKCA
Cistanoside D	TACR2
Coptisine	ACHE
Coptisine	ADRA2B
Coptisine	ADRA2C
Coptisine	AR
Coptisine	BCHE
Coptisine	CDC42
Coptisine	CHEK2
Coptisine	CHRM1
Coptisine	CHRM4
Coptisine	CYP2D6
Coptisine	DHFR
Coptisine	ESR1
Coptisine	HPGD
Coptisine	HTR2B
Coptisine	KCNH2
Coptisine	NOS2
Coptisine	NOS3
Coptisine	PRSS1
Coptisine	PTGS1
Coptisine	PTGS2
Coptisine	RAC1
Coptisine	SAE1UBA2
Coptisine	SCN5A
Coptisine	SIGMAR1
Corydaline	ABCB1
Corydaline	ADRA1A
Corydaline	ADRA1B
Corydaline	ADRA1D
Corydaline	ADRA2B
Corydaline	ADRB2
Corydaline	CA2
Corydaline	CALM
Corydaline	CHRM1
Corydaline	CHRM3
Corydaline	CHRM4
Corydaline	CHRM5
Corydaline	DRD1
Corydaline	DRD2
Corydaline	DRD3
Corydaline	DRD4
Corydaline	DRD5
Corydaline	F3
Corydaline	HTR1A
Corydaline	HTR2A
Corydaline	HTR2C
Corydaline	HTR7
Corydaline	KCNH2
Corydaline	OPRD1
Corydaline	OPRM1
Corydaline	PTGS2
Corydaline	RXRA
Corydaline	RXRB
Corydaline	SCN5A
Corydaline	SIGMAR1
Corydaline	SLC6A3
Corydaline	SLC6A4
costunolide	AR
costunolide	ATP12A
costunolide	CYP11B1
costunolide	CYP19A1
costunolide	FNTA
costunolide	FNTB
costunolide	GSK3B
costunolide	HMGCR
costunolide	IL1B
costunolide	PARP1
costunolide	PCSK7
costunolide	PDE4D
costunolide	PGR
costunolide	PTGS2
costunolide	PTPN1
costunolide	TTL
Crocetin	ACE
Crocetin	ADRA1A
Crocetin	ADRA1B
Crocetin	BCL2
Crocetin	CHRM1
Crocetin	CHRM2
Crocetin	CHRM3
Crocetin	FOLH1
Crocetin	GABRA1
Crocetin	GABRA2
Crocetin	GABRA3
Crocetin	GABRA5
Crocetin	GSK3B
Crocetin	IGHG1
Crocetin	KDM2B
Crocetin	KDM4C
Crocetin	KDM5A
Crocetin	MCL1
Crocetin	MDM2
Crocetin	MME
Crocetin	NCOA2
Crocetin	PTGDR2
Crocetin	PTGER1
Crocetin	PTGS2
Crocetin	SLC16A3
Crocetin	SLC22A12
Crocetin	TBXAS1
Crocetin	VCAM1
Crocin-2	ADRA1A
Crocin-2	ADRA1B
Crocin-2	ATP1A1
Crocin-2	ATP6AP1
Crocin-2	CCR6
Crocin-2	EDNRA
Crocin-2	GCGR
Crocin-2	GLRA1
Crocin-2	GLRA2
Crocin-2	KDR
Crocin-2	METAP2
Crocin-2	PLA2G1B
Crocin-2	PRKCA
Crocin-2	RORC
Crocin-2	STAT3
crocin-3	ADORA1
crocin-3	ADORA2A
crocin-3	ADORA3
crocin-3	ADRA1A
crocin-3	ADRA1B
crocin-3	ATP6AP1
crocin-3	CCR6
crocin-3	CTSD
crocin-3	EDNRA
crocin-3	GCGR
crocin-3	HK1
crocin-3	HK2
crocin-3	TACR3
crocin-3	TBXAS1
crocin-3	TYMS
Crocin-I	ADRA1A
Crocin-I	ADRA1B
Crocin-I	ATP1A1
Crocin-I	ATP6AP1
Crocin-I	CCR6
Crocin-I	EDNRA
Crocin-I	GCGR
Crocin-I	GLRA1
Crocin-I	GLRA2
Crocin-I	KDR
Crocin-I	METAP2
Crocin-I	PLA2G1B
Crocin-I	PRKCA
Crocin-I	RORC
Crocin-I	SMPD2
Crocin-I	STAT3
crocusatin-C	AKR1B10
crocusatin-C	AR
crocusatin-C	CYP19A1
crocusatin-C	NPC1L1
crocusatin-C	NR1H3
crocusatin-C	NR3C1
crocusatin-C	PGR
crocusatin-C	PRKCH
crocusatin-C	PTPN1
crocusatin-C	PTPN11
crocusatin-C	PTPN2
crocusatin-C	RORA
crocusatin-C	SHBG
crocusatin-C	SIGMAR1
crocusatin-C	TNF
Darendoside A	ADORA2A
Darendoside A	ADORA3
Darendoside A	AMY2A
Darendoside A	CA14
Darendoside A	CASP3
Darendoside A	FUCA1
Darendoside A	HSP90AA1
Darendoside A	MMP1
Darendoside A	MMP12
Darendoside A	MMP13
Darendoside A	MMP7
Darendoside A	MMP8
Darendoside A	NEU4
Darendoside A	TNF
Darendoside A	TYR
Deacetyl-asperulosidic acid methyl ester	ADORA1
Deacetyl-asperulosidic acid methyl ester	ADORA2A
Deacetyl-asperulosidic acid methyl ester	ADORA3
Deacetyl-asperulosidic acid methyl ester	AKR1B1
Deacetyl-asperulosidic acid methyl ester	BCL2L1
Deacetyl-asperulosidic acid methyl ester	CA1
Deacetyl-asperulosidic acid methyl ester	CA12
Deacetyl-asperulosidic acid methyl ester	CA2
Deacetyl-asperulosidic acid methyl ester	CA9
Deacetyl-asperulosidic acid methyl ester	IMPDH1
Deacetyl-asperulosidic acid methyl ester	IMPDH2
Deacetyl-asperulosidic acid methyl ester	MGAM
Deacetyl-asperulosidic acid methyl ester	PNP
Deacetyl-asperulosidic acid methyl ester	SI
Deacetyl-asperulosidic acid methyl ester	TYMP
Dehydrocorydaline	ACHE
Dehydrocorydaline	ADRA2B
Dehydrocorydaline	ADRA2C
Dehydrocorydaline	AR
Dehydrocorydaline	BCHE
Dehydrocorydaline	CALM
Dehydrocorydaline	CCNC
Dehydrocorydaline	CDK8
Dehydrocorydaline	CDC42
Dehydrocorydaline	CHEK1
Dehydrocorydaline	CHRM1
Dehydrocorydaline	CYP2D6
Dehydrocorydaline	DHFR
Dehydrocorydaline	ESR1
Dehydrocorydaline	HCRTR2
Dehydrocorydaline	HTR2B
Dehydrocorydaline	KCNH2
Dehydrocorydaline	MAP2K1
Dehydrocorydaline	MAPK14
Dehydrocorydaline	NCOA2
Dehydrocorydaline	NOS2
Dehydrocorydaline	PDE10A
Dehydrocorydaline	PIM1
Dehydrocorydaline	PRSS1
Dehydrocorydaline	PTGS1
Dehydrocorydaline	PTGS2
Dehydrocorydaline	RAC1
Dehydrocorydaline	RXRA
Dehydrocorydaline	RXRB
Dehydrocorydaline	SAE1UBA2
Dehydrocorydaline	SCN5A
Dehydrocorydaline	SIGMAR1
dehydrocostuslactone	ACHE
dehydrocostuslactone	BAK1
dehydrocostuslactone	BAX
dehydrocostuslactone	BCL2L1
dehydrocostuslactone	BID
dehydrocostuslactone	BIK
dehydrocostuslactone	BMF
dehydrocostuslactone	BOK
dehydrocostuslactone	CASP3
dehydrocostuslactone	CASP7
dehydrocostuslactone	CASP8
dehydrocostuslactone	CASP9
dehydrocostuslactone	CHRNA7
dehydrocostuslactone	CTRC
dehydrocostuslactone	CYP11B1
dehydrocostuslactone	CYP11B2
dehydrocostuslactone	CYP19A1
dehydrocostuslactone	DPP4
dehydrocostuslactone	F2
dehydrocostuslactone	FLT3
dehydrocostuslactone	GABRA1
dehydrocostuslactone	GABRA2
dehydrocostuslactone	GABRA3
dehydrocostuslactone	GABRA5
dehydrocostuslactone	GABRA6
dehydrocostuslactone	GRIA2
dehydrocostuslactone	GSK3B
dehydrocostuslactone	HSD11B1
dehydrocostuslactone	KCNK2
dehydrocostuslactone	LRRK2
dehydrocostuslactone	PARP1
dehydrocostuslactone	POLB
dehydrocostuslactone	PRSS1
dehydrocostuslactone	PTGS2
dehydrocostuslactone	TBXAS1
Dehydroglaucine	ADORA1
Dehydroglaucine	ADORA2A
Dehydroglaucine	ALOX5
Dehydroglaucine	AR
Dehydroglaucine	BRPF1
Dehydroglaucine	CYP11B1
Dehydroglaucine	CYP11B2
Dehydroglaucine	CYP2C19
Dehydroglaucine	DRD2
Dehydroglaucine	ESR1
Dehydroglaucine	ESR2
Dehydroglaucine	KCNH2
Dehydroglaucine	NCOA2
Dehydroglaucine	NOS2
Dehydroglaucine	NOS3
Dehydroglaucine	PDE2A
Dehydroglaucine	PDE3B
Dehydroglaucine	PDE4C
Dehydroglaucine	PDE4D
Dehydroglaucine	PDE7A
Dehydroglaucine	PGGT1
Dehydroglaucine	BFNTA
Dehydroglaucine	PIM1
Dehydroglaucine	PTGS1
Dehydroglaucine	PTGS2
Dehydroglaucine	RXRA
Dehydroglaucine	TGFBR1
Demethyleneberberine	ACHE
Demethyleneberberine	ADRA2B
Demethyleneberberine	ADRA2C
Demethyleneberberine	BCHE
Demethyleneberberine	CDC42
Demethyleneberberine	CHRM1
Demethyleneberberine	CYP2D6
Demethyleneberberine	GABRB3
Demethyleneberberine	GABRA3
Demethyleneberberine	GABRG2
Demethyleneberberine	GABRA1
Demethyleneberberine	GABRA5
Demethyleneberberine	HTR2B
Demethyleneberberine	MAOB
Demethyleneberberine	RAC1
Demethyleneberberine	SAE1UBA2
Demethyleneberberine	SIGMAR1
Dihydrobaicalin	ABCB1
Dihydrobaicalin	CA13
Dihydrobaicalin	CA3
Dihydrobaicalin	CA5A
Dihydrobaicalin	CA5B
Dihydrobaicalin	CA6
Dihydrobaicalin	CA7
Dihydrobaicalin	CYP19A1
Dihydrobaicalin	EIF4A1
Dihydrobaicalin	ESR1
Dihydrobaicalin	PTGS1
Dihydrobaicalin	PTGS2
Dihydrobaicalin	SLC28A3
Dihydrobaicalin	SLC5A4
Dihydrobaicalin	SRD5A1
Dihydrobaicalin	TAS2R31
Dihydrobaicalin	TDP1
Dihydroxy-dimethoxyflavone	ABCB1
Dihydroxy-dimethoxyflavone	ABCG2
Dihydroxy-dimethoxyflavone	ADORA1
Dihydroxy-dimethoxyflavone	ADORA2A
Dihydroxy-dimethoxyflavone	ADORA3
Dihydroxy-dimethoxyflavone	AKR1B1
Dihydroxy-dimethoxyflavone	ESR2
Dihydroxy-dimethoxyflavone	KIT
Dihydroxy-dimethoxyflavone	MCL1
Dihydroxy-dimethoxyflavone	NOS2
Dihydroxy-dimethoxyflavone	NOX4
Dihydroxy-dimethoxyflavone	ODC1
Dihydroxy-dimethoxyflavone	OPRD1
Dihydroxy-dimethoxyflavone	PLG
Dihydroxy-dimethoxyflavone	PTGS2
Emodin	ABCB1
Emodin	ACTA2
Emodin	BCHE
Emodin	BCL2
Emodin	BTK
Emodin	CALM
Emodin	CASP3
Emodin	CDKN1A
Emodin	CSF2
Emodin	CSNK2A1
Emodin	CYP19A1
Emodin	CYP1A1
Emodin	EGF
Emodin	ELANE
Emodin	ESR1
Emodin	ESR2
Emodin	F7
Emodin	FLT1
Emodin	FLT2
Emodin	FLT3
Emodin	FNTA
Emodin	FNTB
Emodin	FTO
Emodin	IGHG1
Emodin	IL1B
Emodin	LCK
Emodin	LIMK1
Emodin	MAOB
Emodin	MCL1
Emodin	MMP1
Emodin	MMP9
Emodin	MYC
Emodin	NCOA1
Emodin	NCOA2
Emodin	PIK3CG
Emodin	PIM1
Emodin	PPARG
Emodin	PRKCD
Emodin	PRKCE
Emodin	PTGS1
Emodin	PTGS2
Emodin	PTP4A3
Emodin	SLC2A1
Emodin	SLC2A4
Emodin	TGFB1
Emodin	TNF
Emodin	TP53
Gallic acid	CA1
Gallic acid	CA12
Gallic acid	CA13
Gallic acid	CA14
Gallic acid	CA2
Gallic acid	CA3
Gallic acid	CA4
Gallic acid	CA5A
Gallic acid	CA5B
Gallic acid	CA6
Gallic acid	CA7
Gallic acid	CA9
Gallic acid	CASP3
Gallic acid	CASP9
Gallic acid	CYP3A43
Gallic acid	FASLG
Gallic acid	FUT7
Gallic acid	LDHA
Gallic acid	MAOB
Gallic acid	MGST1
Gallic acid	PGR
Gallic acid	PIK3CG
Gallic acid	PTGS1
Gallic acid	PTGS2
Gallic acid	SQLE
Gallic acid	TP53
Galloyl glucose	ADA
Galloyl glucose	ADORA2A
Galloyl glucose	AKR1B1
Galloyl glucose	AMY1A
Galloyl glucose	BACE1
Galloyl glucose	F10
Galloyl glucose	MGAM
Galloyl glucose	PNP
Galloyl glucose	PTPN1
Galloyl glucose	PTPN2
Galloyl glucose	SERPINE1
Galloyl glucose	SQLE
Galloyl glucose	TDP1
Galloyl glucose	TNNC1
Galloyl glucose	TNNI3
Galloyl glucose	TNNT2
Galloyl glucose	VCP
gardenoside	ADORA1
gardenoside	ADORA2A
gardenoside	CA1
gardenoside	CA12
gardenoside	CA2
gardenoside	CA9
gardenoside	FHIT
gardenoside	FUCA1
gardenoside	HK1
gardenoside	HK2
gardenoside	IL2
gardenoside	IMPDH1
gardenoside	IMPDH2
gardenoside	LGALS3
gardenoside	MGAM
gardoside	ADORA1
gardoside	ENGASE
gardoside	FOLH1
gardoside	HSP90AA1
gardoside	MGAM
gardoside	NAALAD2
gardoside	NEU2
gardoside	NEU3
gardoside	NEU4
gardoside	OGA
gardoside	PYGL
gardoside	PYGM
gardoside	SELL
gardoside	SELP
gardoside	YARS
genipin	ABCC2
genipin	CA2
genipin	GABRA1
genipin	GABRA2
genipin	GABRA6
genipin	GRIA2
genipin	PRSS1
genipin	PTGS1
genipin	PTGS2
genipin	TK1
genipin-1-β-gentiobioside	ADORA1
genipin-1-β-gentiobioside	ADORA2A
genipin-1-β-gentiobioside	ADORA2B
genipin-1-β-gentiobioside	ADORA3
genipin-1-β-gentiobioside	AMY1A
genipin-1-β-gentiobioside	AMY2A
genipin-1-β-gentiobioside	CA1
genipin-1-β-gentiobioside	CA12
genipin-1-β-gentiobioside	CA14
genipin-1-β-gentiobioside	CA2
genipin-1-β-gentiobioside	CA9
genipin-1-β-gentiobioside	CHIA
genipin-1-β-gentiobioside	EPHX2
genipin-1-β-gentiobioside	GAA
genipin-1-β-gentiobioside	TYR
geniposide	ADA
geniposide	ADK
geniposide	ADORA1
geniposide	ADORA2A
geniposide	ADORA3
geniposide	BCL2
geniposide	CA1
geniposide	CA12
geniposide	CA14
geniposide	CA2
geniposide	CA9
geniposide	FUCA1
geniposide	GAP43
geniposide	GCG
geniposide	GSTM1
geniposide	GSTM2
geniposide	HMOX1
geniposide	LGALS3
geniposide	LGALS9
geniposide	OGA
geniposide	PLB1
geniposide	SLC29A1
Glaucine	ACHE
Glaucine	ADRA1A
Glaucine	ADRA1B
Glaucine	ADRA1D
Glaucine	ADRB2
Glaucine	AR
Glaucine	CALM
Glaucine	CHRM1
Glaucine	CHRM3
Glaucine	CHRM4
Glaucine	CHRM5
Glaucine	CHRNA4
Glaucine	CHRNB2
Glaucine	DRD1
Glaucine	DRD2
Glaucine	DRD4
Glaucine	HTR1A
Glaucine	HTR1D
Glaucine	HTR2A
Glaucine	HTR2B
Glaucine	HTR2C
Glaucine	HTR5A
Glaucine	HTR6
Glaucine	HTR7
Glaucine	KCNH2
Glaucine	KCNMA1
Glaucine	NOS3
Glaucine	OPRD1
Glaucine	OPRM1
Glaucine	PRSS1
Glaucine	PTGS1
Glaucine	PTGS2
Glaucine	RXRA
Glaucine	RXRB
Glaucine	SCN5A
Glaucine	SLC6A3
Glaucine	SLC6A4
hyperoside	ACHE
hyperoside	ADRA2A
hyperoside	ADRA2C
hyperoside	AKR1B1
hyperoside	CA12
hyperoside	CA2
hyperoside	CA4
hyperoside	CA7
hyperoside	CD38
hyperoside	NCOA2
hyperoside	NMUR2
hyperoside	NOS2
hyperoside	NOX4
hyperoside	NQO2
hyperoside	PDE5A
hyperoside	PIK3CG
hyperoside	PRSS1
hyperoside	PTGS1
hyperoside	PTGS2
hyperoside	RPS6KA3
Isoform of Glaucine （(+)-corybulbine）	ADRA1A
Isoform of Glaucine （(+)-corybulbine）	ADRA1B
Isoform of Glaucine （(+)-corybulbine）	ADRA1D
Isoform of Glaucine （(+)-corybulbine）	ADRB1
Isoform of Glaucine （(+)-corybulbine）	ADRB2
Isoform of Glaucine （(+)-corybulbine）	CALM
Isoform of Glaucine （(+)-corybulbine）	CHRM1
Isoform of Glaucine （(+)-corybulbine）	CHRM3
Isoform of Glaucine （(+)-corybulbine）	CHRM4
Isoform of Glaucine （(+)-corybulbine）	CHRM5
Isoform of Glaucine （(+)-corybulbine）	DRD1
Isoform of Glaucine （(+)-corybulbine）	DRD2
Isoform of Glaucine （(+)-corybulbine）	DRD3
Isoform of Glaucine （(+)-corybulbine）	DRD4
Isoform of Glaucine （(+)-corybulbine）	DRD5
Isoform of Glaucine （(+)-corybulbine）	F3
Isoform of Glaucine （(+)-corybulbine）	HTR1A
Isoform of Glaucine （(+)-corybulbine）	HTR2A
Isoform of Glaucine （(+)-corybulbine）	HTR2C
Isoform of Glaucine （(+)-corybulbine）	HTR7
Isoform of Glaucine （(+)-corybulbine）	KCNH2
Isoform of Glaucine （(+)-corybulbine）	OPRD1
Isoform of Glaucine （(+)-corybulbine）	OPRM1
Isoform of Glaucine （(+)-corybulbine）	PTGS2
Isoform of Glaucine （(+)-corybulbine）	RXRA
Isoform of Glaucine （(+)-corybulbine）	SCN5A
Isoform of Glaucine （(+)-corybulbine）	SIGMAR1
Isoform of Glaucine （(+)-corybulbine）	SLC6A4
Isoform of Glaucine （(+)-corybulbine）	TBXA2R
isoquercitrin	ACHE
isoquercitrin	ADRA2A
isoquercitrin	ADRA2C
isoquercitrin	AKR1B1
isoquercitrin	AR
isoquercitrin	CA12
isoquercitrin	CA2
isoquercitrin	CA4
isoquercitrin	CA7
isoquercitrin	CCNA2
isoquercitrin	CD38
isoquercitrin	DPP4
isoquercitrin	ESR1
isoquercitrin	ESR2
isoquercitrin	GSK3B
isoquercitrin	MAPK14
isoquercitrin	NMUR2
isoquercitrin	NOS2
isoquercitrin	NOX4
isoquercitrin	NQO2
isoquercitrin	PDE5A
isoquercitrin	PIK3CG
isoquercitrin	PIM1
isoquercitrin	PPARG
isoquercitrin	PTGS1
isoquercitrin	PTGS2
isoquercitrin	RPS6KA3
jasminoside B	ADORA2A
jasminoside B	ADORA3
jasminoside B	GLRA1
jasminoside B	GLRA2
jasminoside B	HK1
jasminoside B	HK2
jasminoside B	HSD11B2
jasminoside B	LGALS9
jasminoside B	PPP1CC
jasminoside B	PPP2CA
jasminoside B	PPP2R5A
jasminoside B	PTPN1
jasminoside B	SLC5A1
jasminoside B	SLC5A2
jasminoside B	TYR
jasminoside D	ACE
jasminoside D	ADK
jasminoside D	ADORA1
jasminoside D	ADORA3
jasminoside D	CD22
jasminoside D	ECE1
jasminoside D	HK1
jasminoside D	HK2
jasminoside D	IL2
jasminoside D	LGALS3
jasminoside D	MAG
jasminoside D	MME
jasminoside D	NEU2
jasminoside D	NPC1L1
jasminoside D	SELP
jasminoside S/H/I	ADORA2A
jasminoside S/H/I	ADORA2B
jasminoside S/H/I	ADORA3
jasminoside S/H/I	ATP1A1
jasminoside S/H/I	GLRA1
jasminoside S/H/I	GLRA2
jasminoside S/H/I	HSD11B2
jasminoside S/H/I	PLA2G1B
jasminoside S/H/I	PPM1B
jasminoside S/H/I	PPP2R5A
jasminoside S/H/I	PRKCA
jasminoside S/H/I	PRKCD
jasminoside S/H/I	PRKCE
jasminoside S/H/I	RORC
jasminoside S/H/I	STAT3
jasminoside T	ADORA2A
jasminoside T	ADORA3
jasminoside T	F2
jasminoside T	GLI1
jasminoside T	HSD11B1
jasminoside T	HSD11B2
jasminoside T	IL2
jasminoside T	PPM1B
jasminoside T	PPP2R5A
jasminoside T	PTPN1
jasminoside T	PTPRA
jasminoside T	SLC29A1
jasminoside T	STAT3
jasminoside T	TOP1
jasminoside T	TYR
Jatrorrhizine	ACHE
Jatrorrhizine	ADRA2B
Jatrorrhizine	ADRA2C
Jatrorrhizine	AR
Jatrorrhizine	BCHE
Jatrorrhizine	CALM
Jatrorrhizine	CCNA2
Jatrorrhizine	CDC42
Jatrorrhizine	CHRM1
Jatrorrhizine	CYP2D6
Jatrorrhizine	ESR1
Jatrorrhizine	ESR2
Jatrorrhizine	HTR2B
Jatrorrhizine	KCNH2
Jatrorrhizine	KCNMA1
Jatrorrhizine	MAPK8
Jatrorrhizine	MIF
Jatrorrhizine	NCOA2
Jatrorrhizine	NOS2
Jatrorrhizine	NOS3
Jatrorrhizine	PIM1
Jatrorrhizine	PRSS1
Jatrorrhizine	PTGS1
Jatrorrhizine	PTGS2
Jatrorrhizine	RAC1
Jatrorrhizine	RXRA
Jatrorrhizine	SAE1UBA2
Jatrorrhizine	SCN5A
Jatrorrhizine	SIGMAR1
Jatrorrhizine	TRPM8
Jatrorrhizine	TTK
Leucosceptoside A	AKR1B1
Leucosceptoside A	AKR1B10
Leucosceptoside A	APP
Leucosceptoside A	CA13
Leucosceptoside A	CA5A
Leucosceptoside A	CA5B
Leucosceptoside A	CA6
Leucosceptoside A	CCNA2
Leucosceptoside A	F2
Leucosceptoside A	IMPDH1
Leucosceptoside A	ITGA2B
Leucosceptoside A	ITGAV
Leucosceptoside A	ITGB3
Leucosceptoside A	MMP12
Leucosceptoside A	MMP2
Leucosceptoside A	PRKCA
Leucosceptoside A	PRSS1
Leucosceptoside A	TTR
Mudanpioside I	AMY1A
Mudanpioside I	FGF1
Mudanpioside I	FGF2
Mudanpioside I	HPSE
Mudanpioside I	HSP90AA1
Mudanpioside I	LGALS3
Mudanpioside I	LGALS9
Mudanpioside I	PTPN1
Mudanpioside I	SERPINE1
Mudanpioside I	SLC6A2
Mudanpioside I	SSTR1
Mudanpioside I	SSTR2
Mudanpioside I	SSTR3
Mudanpioside I	SSTR4
Mudanpioside I	VEGFA
Norwogonin	ABCB1
Norwogonin	AKR1B1
Norwogonin	ALOX12
Norwogonin	ALOX15
Norwogonin	AR
Norwogonin	CDK1
Norwogonin	CHEK1
Norwogonin	CYP19A1
Norwogonin	DPP4
Norwogonin	GRK6
Norwogonin	HSD17B1
Norwogonin	HSD17B2
Norwogonin	IKBKB
Norwogonin	KDM4E
Norwogonin	NOS2
Norwogonin	NTRK2
Norwogonin	PDE3A
Norwogonin	PFKFB3
Norwogonin	PIK3CG
Norwogonin	PPARG
Norwogonin	PTGS1
Norwogonin	PTGS2
Norwogonin	TERT
Norwogonin	XDH
oleanolic acid	ACP1
oleanolic acid	ADRB2
oleanolic acid	AKR1B10
oleanolic acid	AMY2A
oleanolic acid	CALM
oleanolic acid	CASP3
oleanolic acid	CASP9
oleanolic acid	CD81
oleanolic acid	CDC25A
oleanolic acid	CDC25B
oleanolic acid	HMOX1
oleanolic acid	HSD11B1
oleanolic acid	ICAM1
oleanolic acid	MAOB
oleanolic acid	NOS2
oleanolic acid	NQO1
oleanolic acid	PDE3A
oleanolic acid	PDE4D
oleanolic acid	PKIA
oleanolic acid	PLA2G1B
oleanolic acid	POLB
oleanolic acid	PTGES
oleanolic acid	PTGS1
oleanolic acid	PTGS2
oleanolic acid	PTPN1
oleanolic acid	PTPN2
oleanolic acid	PTPRF
oleanolic acid	RORC
oleanolic acid	RXRA
oleanolic acid	SLC6A4
Oroxylin A	ABCB1
Oroxylin A	ADORA1
Oroxylin A	ADORA2A
Oroxylin A	ADRA1B
Oroxylin A	ADRB2
Oroxylin A	ALOX12
Oroxylin A	ALOX15
Oroxylin A	AR
Oroxylin A	BCL2
Oroxylin A	CALM
Oroxylin A	CASP3
Oroxylin A	CCNB1
Oroxylin A	CDK1
Oroxylin A	CDK7
Oroxylin A	CYP1A2
Oroxylin A	CYP2C9
Oroxylin A	DPP4
Oroxylin A	FLT3
Oroxylin A	GRK6
Oroxylin A	IL6
Oroxylin A	KDM4E
Oroxylin A	KIT
Oroxylin A	NCOA1
Oroxylin A	NCOA2
Oroxylin A	NOS2
Oroxylin A	OPRD1
Oroxylin A	PDE3A
Oroxylin A	PIK3CG
Oroxylin A	PIM1
Oroxylin A	PKIA
Oroxylin A	PRSS1
Oroxylin A	PTGS1
Oroxylin A	PTGS2
Oroxylin A	RXRA
Oroxylin A	SCN5A
Oroxylin A	XDH
Oroxyloside	ACHE
Oroxyloside	ADORA1
Oroxyloside	ADRA2A
Oroxyloside	AKR1B1
Oroxyloside	CA12
Oroxyloside	CA2
Oroxyloside	FDFT1
Oroxyloside	IL2
Oroxyloside	NEU2
Oroxyloside	NMUR2
Oroxyloside	NQO2
Oroxyloside	PTGS2
Oroxyloside	RPS6KA3
Oroxyloside	TNF
Oroxyloside	XDH
Oxypaeoniflorin	AKR1B1
Oxypaeoniflorin	AMY1A
Oxypaeoniflorin	F10
Oxypaeoniflorin	HSP90AA1
Oxypaeoniflorin	LGALS3
Oxypaeoniflorin	LGALS9
Oxypaeoniflorin	MMP1
Oxypaeoniflorin	MMP13
Oxypaeoniflorin	MMP7
Oxypaeoniflorin	MMP8
Oxypaeoniflorin	PTPN1
Oxypaeoniflorin	SERPINE1
Oxypaeoniflorin	SQLE
Oxypaeoniflorin	SSTR5
Oxypaeoniflorin	TDP1
Paeoniflorin	ADORA2A
Paeoniflorin	ADORA2B
Paeoniflorin	ADORA3
Paeoniflorin	CA14
Paeoniflorin	CD14
Paeoniflorin	FGF1
Paeoniflorin	FGF2
Paeoniflorin	HSP90AA1
Paeoniflorin	IL6
Paeoniflorin	LBP
Paeoniflorin	LGALS3
Paeoniflorin	LGALS9
Paeoniflorin	SLC6A2
Paeoniflorin	SSTR1
Paeoniflorin	SSTR2
Paeoniflorin	SSTR3
Paeoniflorin	SSTR4
Paeoniflorin	TNF
Paeoniflorin	VEGFA
Palmatine	ACHE
Palmatine	ADRA2B
Palmatine	ADRA2C
Palmatine	ADRB2
Palmatine	AR
Palmatine	AURKA
Palmatine	AURKB
Palmatine	BCHE
Palmatine	CALM
Palmatine	CDC42
Palmatine	CHRM1
Palmatine	CYP2D6
Palmatine	ESR1
Palmatine	ESR2
Palmatine	F7
Palmatine	HTR2B
Palmatine	KCNH2
Palmatine	MAP2K1
Palmatine	NCOA2
Palmatine	NOS2
Palmatine	NOS3
Palmatine	PIM1
Palmatine	PRSS1
Palmatine	PTGS1
Palmatine	PTGS2
Palmatine	RAC1
Palmatine	RXRA
Palmatine	SAE1UBA2
Palmatine	SCN5A
Palmatine	SIGMAR1
Palmatine	TEK
Phenylalanine	ADORA3
Phenylalanine	ADRA1A
Phenylalanine	ADRA2A
Phenylalanine	ADRA2B
Phenylalanine	CACNA2D1
Phenylalanine	EGFR
Phenylalanine	FYN
Phenylalanine	GABBR1
Phenylalanine	GABBR2
Phenylalanine	KDM4C
Phenylalanine	KDM4E
Phenylalanine	LCK
Phenylalanine	SLC7A5
Phenylalanine	TACR1
Phenylalanine	TH
Physcion	BCL2
Physcion	CALM
Physcion	CSNK2A1
Physcion	DUSP3
Physcion	EGFR
Physcion	ELANE
Physcion	ESR1
Physcion	ESR2
Physcion	F7
Physcion	FTO
Physcion	IGHG1
Physcion	LCK
Physcion	LIMK1
Physcion	MCL1
Physcion	MMP1
Physcion	MMP3
Physcion	NCOA1
Physcion	NCOA2
Physcion	NOS3
Physcion	PIK3CG
Physcion	PIM1
Physcion	PKIA
Physcion	PTGS1
Physcion	PTGS2
Physcion	PTP4A3
Physcion	RXRA
Physcion	SCN5A
protocatechualdehyde	ADH1C
protocatechualdehyde	CA1
protocatechualdehyde	CA12
protocatechualdehyde	CA14
protocatechualdehyde	CA2
protocatechualdehyde	CA3
protocatechualdehyde	CA4
protocatechualdehyde	CA5A
protocatechualdehyde	CA5B
protocatechualdehyde	CA6
protocatechualdehyde	CA7
protocatechualdehyde	CA9
protocatechualdehyde	CHRM1
protocatechualdehyde	CHRM2
protocatechualdehyde	CHRM3
protocatechualdehyde	CHRNA7
protocatechualdehyde	COMT
protocatechualdehyde	ERN1
protocatechualdehyde	FUT7
protocatechualdehyde	GABRA1
protocatechualdehyde	GABRA2
protocatechualdehyde	GABRA3
protocatechualdehyde	GABRA6
protocatechualdehyde	ODC1
protocatechualdehyde	TYR
Protocatechuic acid	ADH1C
Protocatechuic acid	ALOX5
Protocatechuic acid	CA1
Protocatechuic acid	CA12
Protocatechuic acid	CA13
Protocatechuic acid	CA14
Protocatechuic acid	CA2
Protocatechuic acid	CA3
Protocatechuic acid	CA4
Protocatechuic acid	CA5A
Protocatechuic acid	CA5B
Protocatechuic acid	CA6
Protocatechuic acid	CA7
Protocatechuic acid	CA9
Protocatechuic acid	FUT7
Protocatechuic acid	LDHA
Protocatechuic acid	MAOB
Protocatechuic acid	MGAM
Protocatechuic acid	PRKCA
Protocatechuic acid	PRKCB
Protocatechuic acid	PRKCG
Protocatechuic acid	PRKCZ
Protocatechuic acid	PRSS3
Protocatechuic acid	PTGS1
Protocatechuic acid	PTGS2
Protocatechuic acid	SQLE
Protopine	ADRA1A
Protopine	ADRA1B
Protopine	ADRA1D
Protopine	ADRB2
Protopine	CACNA1S
Protopine	CALM
Protopine	CDC7
Protopine	CDK2C
Protopine	CCNA1
Protopine	CNA2
Protopine	CHEK1
Protopine	CHRM1
Protopine	CHRM3
Protopine	CHRM4
Protopine	CHRM5
Protopine	DRD1
Protopine	DRD2
Protopine	DRD3
Protopine	DRD4
Protopine	F3
Protopine	F7
Protopine	FLT2
Protopine	HTR1A
Protopine	HTR2A
Protopine	HTR3A
Protopine	HTR7
Protopine	KCNH2
Protopine	OPRD1
Protopine	OPRM1
Protopine	PDE3A
Protopine	PTGS1
Protopine	PTGS2
Protopine	SCN5A
Protopine	SIGMAR1
Protopine	SLC6A3
Protopine	SLC6A4
quercetin	ABCG2
quercetin	ACACA
quercetin	ACHE
quercetin	ACPP
quercetin	ADRB2
quercetin	AHR
quercetin	AHSA1
quercetin	AKR1B1
quercetin	AKT1
quercetin	ALOX5
quercetin	AR
quercetin	AURKB
quercetin	AVPR2
quercetin	BAX
quercetin	BCL2
quercetin	BCL2L1
quercetin	BIRC5
quercetin	CA2
quercetin	CASP3
quercetin	CASP8
quercetin	CASP9
quercetin	CAV1
quercetin	CCL2
quercetin	CCNB1
quercetin	CCND1
quercetin	CD40LG
quercetin	CDKN1A
quercetin	CHEK1
quercetin	CHUK
quercetin	CLDN4
quercetin	COL1A1
quercetin	COL3A1
quercetin	CRP
quercetin	CTSD
quercetin	CXCL10
quercetin	CXCL11
quercetin	CXCL2
quercetin	CYP19A1
quercetin	CYP1A1
quercetin	CYP1A2
quercetin	CYP1B1
quercetin	CYP3A4
quercetin	DCAF5
quercetin	DIO1
quercetin	DPP4
quercetin	DRD4
quercetin	DUOX2
quercetin	E2F1
quercetin	E2F2
quercetin	EGF
quercetin	EGFR
quercetin	EGFR
quercetin	EIF6
quercetin	ELK1
quercetin	ERBB2
quercetin	ERBB3
quercetin	F2
quercetin	F3
quercetin	F7
quercetin	FLT3
quercetin	FOS
quercetin	GABRA1
quercetin	GJA1
quercetin	GSTM1
quercetin	GSTM2
quercetin	GSTP1
quercetin	HAS2
quercetin	HIF1A
quercetin	HK2
quercetin	HMOX1
quercetin	HSF1
quercetin	HSPA5
quercetin	HSPB1
quercetin	ICAM1
quercetin	IFNG
quercetin	IGF1R
quercetin	IGF2
quercetin	IGFBP3
quercetin	IL10
quercetin	IL1A
quercetin	IL1B
quercetin	IL2
quercetin	IL6
quercetin	IL8
quercetin	INSR
quercetin	IRF1
quercetin	JUN
quercetin	KCNH2
quercetin	MAOA
quercetin	MAOB
quercetin	MAPK1
quercetin	MGAM
quercetin	MMP1
quercetin	MMP2
quercetin	MMP3
quercetin	MMP9
quercetin	MPO
quercetin	MYC
quercetin	NCF1
quercetin	NCOA2
quercetin	NFE2L2
quercetin	NFKBIA
quercetin	NKX3-1
quercetin	NOS3
quercetin	NOX4
quercetin	NPEPPS
quercetin	NQO1
quercetin	NR1I2
quercetin	NR1I3
quercetin	ODC1
quercetin	PARP1
quercetin	PCOLCE
quercetin	PIK3CG
quercetin	PIM1
quercetin	PLAT
quercetin	PLAU
quercetin	PON1
quercetin	POR
quercetin	PPARA
quercetin	PPARD
quercetin	PPARG
quercetin	PRKCA
quercetin	PRKCB
quercetin	PRSS1
quercetin	PSMD3
quercetin	PTEN
quercetin	PTGER3
quercetin	PTGS1
quercetin	PTGS2
quercetin	RAF1
quercetin	RASA1
quercetin	RASSF1
quercetin	RELA
quercetin	RUNX1T1
quercetin	RUNX2
quercetin	RXRA
quercetin	SCN5A
quercetin	SELE
quercetin	SERPINE1
quercetin	SLC2A4
quercetin	SOD1
quercetin	SPP1
quercetin	STAT1
quercetin	SULT1E1
quercetin	TGFB1
quercetin	THBD
quercetin	TNF
quercetin	TOP2A
quercetin	TP53
quercetin	VCAM1
quercetin	VEGFA
quercetin	XDH
Rhein	AKR1B1
Rhein	CASP3
Rhein	CDC25B
Rhein	CSNK2A1
Rhein	CYP19A1
Rhein	ELANE
Rhein	ERN1
Rhein	ESR1
Rhein	ESR2
Rhein	FNTA
Rhein	FNTB
Rhein	FTO
Rhein	JUN
Rhein	LDHA
Rhein	LDHB
Rhein	NCOA2
Rhein	PIK3CG
Rhein	PIM1
Rhein	PTGS1
Rhein	PTGS2
Rhein	PTP4A3
rutin	ACHE
rutin	ADRA2A
rutin	ADRA2C
rutin	AKR1B1
rutin	ALOX5
rutin	C5AR
rutin	CA12
rutin	CA2
rutin	CA4
rutin	CA7
rutin	CASP3
rutin	CAT
rutin	CD38
rutin	DIO1
rutin	FCER2
rutin	GSTP1
rutin	HAS2
rutin	HMGCR
rutin	IL1B
rutin	IL6
rutin	IL8
rutin	INS
rutin	ITGB2
rutin	NMUR2
rutin	NOX4
rutin	NQO2
rutin	POR
rutin	PRKCB
rutin	PTGS2
rutin	RELA
rutin	RPS6KA3
rutin	SOD1
rutin	TBXA2R
rutin	TNF
rutin	XDH
Saikosaponin A	ADORA1
Saikosaponin A	BACE1
Saikosaponin A	BAX
Saikosaponin A	BCL2
Saikosaponin A	CASP3
Saikosaponin A	EGFR
Saikosaponin A	GCK
Saikosaponin A	IL2
Saikosaponin A	LTB4R
Saikosaponin A	MYC
Saikosaponin A	NXT1
Saikosaponin A	PTAFR
Saikosaponin A	PTPN1
Saikosaponin A	PTPN2
Saikosaponin A	PTPN22
Saikosaponin A	PTPRA
Saikosaponin A	REN
Saikosaponin A	SLC5A2
Saikosaponin A	STAT3
Saikosaponin A	TYMS
Saikosaponin B1	GRB2
Saikosaponin B1	IL2
Saikosaponin B1	KDR
Saikosaponin B1	MMP13
Saikosaponin B1	MMP2
Saikosaponin B1	OPRD1
Saikosaponin B1	OPRM1
Saikosaponin B1	PFKFB3
Saikosaponin B1	PTAFR
Saikosaponin B1	PTPN2
Saikosaponin B1	PTPN22
Saikosaponin B1	PTPRA
Saikosaponin B1	REN
Saikosaponin B1	STAT3
Saikosaponin B1	TYMS
Saikosaponin B2	GRB2
Saikosaponin B2	IL2
Saikosaponin B2	KDR
Saikosaponin B2	MMP13
Saikosaponin B2	MMP2
Saikosaponin B2	OPRD1
Saikosaponin B2	OPRM1
Saikosaponin B2	PFKFB3
Saikosaponin B2	PTAFR
Saikosaponin B2	PTPN2
Saikosaponin B2	PTPN22
Saikosaponin B2	PTPRA
Saikosaponin B2	REN
Saikosaponin B2	STAT3
Saikosaponin B2	TYMS
Saikosaponin c or Saikosaponin BK1	ADORA1
Saikosaponin c or Saikosaponin BK1	BCL2L1
Saikosaponin c or Saikosaponin BK1	FGF1
Saikosaponin c or Saikosaponin BK1	FGF2
Saikosaponin c or Saikosaponin BK1	HPSE
Saikosaponin c or Saikosaponin BK1	HSD11B2
Saikosaponin c or Saikosaponin BK1	IL2
Saikosaponin c or Saikosaponin BK1	OPRD1
Saikosaponin c or Saikosaponin BK1	OPRM1
Saikosaponin c or Saikosaponin BK1	PTAFR
Saikosaponin c or Saikosaponin BK1	PTPN2
Saikosaponin c or Saikosaponin BK1	PTPRA
Saikosaponin c or Saikosaponin BK1	STAT3
Saikosaponin c or Saikosaponin BK1	TYMS
Saikosaponin c or Saikosaponin BK1	VEGFA
Saikosaponin f	FGF1
Saikosaponin f	HPSE
Saikosaponin f	HSD11B1
Saikosaponin f	HSD11B2
Saikosaponin f	IL2
Saikosaponin f	LGALS3
Saikosaponin f	LGALS4
Saikosaponin f	LGALS8
Saikosaponin f	PSEN2
Saikosaponin f	PSENEN
Saikosaponin f	NCSTN
Saikosaponin f	APH1A
Saikosaponin f	PSEN1
Saikosaponin f	APH1B
Saikosaponin f	PTAFR
Saikosaponin f	PTPN1
Saikosaponin f	PTPRA
Saikosaponin f	RORC
Saikosaponin f	STAT3
Saikosaponin f	VEGFA
scandoside methyl ester	ADORA1
scandoside methyl ester	ADORA2A
scandoside methyl ester	ADORA3
scandoside methyl ester	AKR1B1
scandoside methyl ester	BCL2L1
scandoside methyl ester	CA1
scandoside methyl ester	CA12
scandoside methyl ester	CA2
scandoside methyl ester	CA9
scandoside methyl ester	IMPDH1
scandoside methyl ester	IMPDH2
scandoside methyl ester	MGAM
scandoside methyl ester	PNP
scandoside methyl ester	SI
scandoside methyl ester	TYMP
Scutellarin	ACHE
Scutellarin	ADORA1
Scutellarin	ADRA2A
Scutellarin	ADRA2C
Scutellarin	AHSA1
Scutellarin	AKR1B1
Scutellarin	BCL2L1
Scutellarin	CA2
Scutellarin	CASP3
Scutellarin	EGFR
Scutellarin	IL2
Scutellarin	NMUR2
Scutellarin	NOX4
Scutellarin	NQO2
Scutellarin	PRKCG
Scutellarin	PTGS2
Scutellarin	RPS6KA3
Scutellarin	TNF
Scutellarin	XDH
shanzhiside	ADORA1
shanzhiside	ADORA3
shanzhiside	AHCY
shanzhiside	CA1
shanzhiside	CA2
shanzhiside	ENGASE
shanzhiside	FGF2
shanzhiside	HSP90AA1
shanzhiside	MGAM
shanzhiside	NAALAD2
shanzhiside	NEU2
shanzhiside	NEU3
shanzhiside	NEU4
shanzhiside	SELP
shanzhiside	YARS
Skullcapflavon II	ABCB1
Skullcapflavon II	ABCG2
Skullcapflavon II	ADORA1
Skullcapflavon II	ADORA2A
Skullcapflavon II	ADORA3
Skullcapflavon II	AKR1B1
Skullcapflavon II	ALOX5
Skullcapflavon II	AR
Skullcapflavon II	CACNA2D1
Skullcapflavon II	CALM
Skullcapflavon II	CHEK1
Skullcapflavon II	CYP1B1
Skullcapflavon II	DPP4
Skullcapflavon II	ESR1
Skullcapflavon II	ESR2
Skullcapflavon II	F7
Skullcapflavon II	FLT2
Skullcapflavon II	GSK3B
Skullcapflavon II	IGHG1
Skullcapflavon II	KCNH2
Skullcapflavon II	KCNMA1
Skullcapflavon II	KIT
Skullcapflavon II	MCL1
Skullcapflavon II	NCOA1
Skullcapflavon II	NCOA2
Skullcapflavon II	NOS2
Skullcapflavon II	NOS3
Skullcapflavon II	ODC1
Skullcapflavon II	OPRD1
Skullcapflavon II	OPRM1
Skullcapflavon II	PPARG
Skullcapflavon II	PRSS1
Skullcapflavon II	PTGS1
Skullcapflavon II	PTGS2
Skullcapflavon II	PYGM
Skullcapflavon II	SCN5A
Skullcapflavone	ABCG2
Skullcapflavone	ADORA1
Skullcapflavone	ADORA2A
Skullcapflavone	AKR1B1
Skullcapflavone	ALOX5
Skullcapflavone	AR
Skullcapflavone	BCHE
Skullcapflavone	CALM
Skullcapflavone	CHEK1
Skullcapflavone	CYP1B1
Skullcapflavone	DPP4
Skullcapflavone	ESR2
Skullcapflavone	KIT
Skullcapflavone	MAOA
Skullcapflavone	MCL1
Skullcapflavone	NCOA1
Skullcapflavone	NOS2
Skullcapflavone	ODC1
Skullcapflavone	OPRD1
Skullcapflavone	OPRM1
Skullcapflavone	PIK3CG
Skullcapflavone	PRSS1
Skullcapflavone	PTGS1
Skullcapflavone	PTGS2
Skullcapflavone	SCN5A
Syringin	ADK
Syringin	ADORA1
Syringin	ADORA2A
Syringin	ADORA2B
Syringin	ADORA3
Syringin	ADRA1A
Syringin	ADRA1B
Syringin	ADRA2A
Syringin	ADRA2B
Syringin	ADRB1
Syringin	ADRB2
Syringin	AKR1B1
Syringin	CA14
Syringin	CHRM1
Syringin	CHRM2
Syringin	CHRM3
Syringin	GABRA1
Syringin	GBA
Syringin	HRAS
Syringin	LTA4H
Syringin	MAOB
Syringin	MMP1
Syringin	MMP7
Syringin	MMP8
Syringin	NOS3
Syringin	PKIA
Syringin	PNP
Syringin	PTGS1
Syringin	PTGS2
Syringin	SLC29A1
Syringin	SLC6A2
Syringin	SLC6A3
Syringin	TYR
Tenaxin I (5,2'-dihydroxy-6,7,8-trimethoxyflavone)	ABCB1
Tenaxin I (5,2'-dihydroxy-6,7,8-trimethoxyflavone)	ABCG2
Tenaxin I (5,2'-dihydroxy-6,7,8-trimethoxyflavone)	ADORA1
Tenaxin I (5,2'-dihydroxy-6,7,8-trimethoxyflavone)	ADORA2A
Tenaxin I (5,2'-dihydroxy-6,7,8-trimethoxyflavone)	ADORA3
Tenaxin I (5,2'-dihydroxy-6,7,8-trimethoxyflavone)	AKR1B1
Tenaxin I (5,2'-dihydroxy-6,7,8-trimethoxyflavone)	ALOX5
Tenaxin I (5,2'-dihydroxy-6,7,8-trimethoxyflavone)	AR
Tenaxin I (5,2'-dihydroxy-6,7,8-trimethoxyflavone)	CALM
Tenaxin I (5,2'-dihydroxy-6,7,8-trimethoxyflavone)	CYP1B1
Tenaxin I (5,2'-dihydroxy-6,7,8-trimethoxyflavone)	DPP4
Tenaxin I (5,2'-dihydroxy-6,7,8-trimethoxyflavone)	ESR2
Tenaxin I (5,2'-dihydroxy-6,7,8-trimethoxyflavone)	F7
Tenaxin I (5,2'-dihydroxy-6,7,8-trimethoxyflavone)	FLT2
Tenaxin I (5,2'-dihydroxy-6,7,8-trimethoxyflavone)	KCNH2
Tenaxin I (5,2'-dihydroxy-6,7,8-trimethoxyflavone)	KCNMA1
Tenaxin I (5,2'-dihydroxy-6,7,8-trimethoxyflavone)	KIT
Tenaxin I (5,2'-dihydroxy-6,7,8-trimethoxyflavone)	MCL1
Tenaxin I (5,2'-dihydroxy-6,7,8-trimethoxyflavone)	NCOA1
Tenaxin I (5,2'-dihydroxy-6,7,8-trimethoxyflavone)	NCOA2
Tenaxin I (5,2'-dihydroxy-6,7,8-trimethoxyflavone)	NOS2
Tenaxin I (5,2'-dihydroxy-6,7,8-trimethoxyflavone)	NOS3
Tenaxin I (5,2'-dihydroxy-6,7,8-trimethoxyflavone)	ODC1
Tenaxin I (5,2'-dihydroxy-6,7,8-trimethoxyflavone)	OPRD1
Tenaxin I (5,2'-dihydroxy-6,7,8-trimethoxyflavone)	OPRM1
Tenaxin I (5,2'-dihydroxy-6,7,8-trimethoxyflavone)	PPARD
Tenaxin I (5,2'-dihydroxy-6,7,8-trimethoxyflavone)	PRSS1
Tenaxin I (5,2'-dihydroxy-6,7,8-trimethoxyflavone)	PTGS1
Tenaxin I (5,2'-dihydroxy-6,7,8-trimethoxyflavone)	PTGS2
Tenaxin I (5,2'-dihydroxy-6,7,8-trimethoxyflavone)	SCN5A
Tetrahydroberberine (Canadine)	ADRA1A
Tetrahydroberberine (Canadine)	ADRA1B
Tetrahydroberberine (Canadine)	ADRA1D
Tetrahydroberberine (Canadine)	ADRA2C
Tetrahydroberberine (Canadine)	ADRB2
Tetrahydroberberine (Canadine)	CALM
Tetrahydroberberine (Canadine)	CHRM1
Tetrahydroberberine (Canadine)	CHRM2
Tetrahydroberberine (Canadine)	CHRM3
Tetrahydroberberine (Canadine)	CHRM4
Tetrahydroberberine (Canadine)	CHRM5
Tetrahydroberberine (Canadine)	DRD1
Tetrahydroberberine (Canadine)	DRD2
Tetrahydroberberine (Canadine)	DRD3
Tetrahydroberberine (Canadine)	DRD4
Tetrahydroberberine (Canadine)	DRD5
Tetrahydroberberine (Canadine)	F3
Tetrahydroberberine (Canadine)	HTR1A
Tetrahydroberberine (Canadine)	HTR2A
Tetrahydroberberine (Canadine)	HTR2C
Tetrahydroberberine (Canadine)	HTR3A
Tetrahydroberberine (Canadine)	HTR7
Tetrahydroberberine (Canadine)	KCNH2
Tetrahydroberberine (Canadine)	KCNMA1
Tetrahydroberberine (Canadine)	OPRD1
Tetrahydroberberine (Canadine)	OPRM1
Tetrahydroberberine (Canadine)	PDE10A
Tetrahydroberberine (Canadine)	PTGS1
Tetrahydroberberine (Canadine)	PTGS2
Tetrahydroberberine (Canadine)	RXRA
Tetrahydroberberine (Canadine)	SCN5A
Tetrahydroberberine (Canadine)	SIGMAR1
Tetrahydroberberine (Canadine)	SLC6A2
Tetrahydroberberine (Canadine)	SLC6A3
Tetrahydroberberine (Canadine)	SLC6A4
Tetrahydrocolumbamine	ADRA1A
Tetrahydrocolumbamine	ADRA1B
Tetrahydrocolumbamine	ADRA1D
Tetrahydrocolumbamine	ADRA2B
Tetrahydrocolumbamine	ADRA2C
Tetrahydrocolumbamine	ADRB2
Tetrahydrocolumbamine	CA2
Tetrahydrocolumbamine	CALM
Tetrahydrocolumbamine	CHRM1
Tetrahydrocolumbamine	CHRM2
Tetrahydrocolumbamine	CHRM3
Tetrahydrocolumbamine	CHRM4
Tetrahydrocolumbamine	CHRM5
Tetrahydrocolumbamine	DRD1
Tetrahydrocolumbamine	DRD2
Tetrahydrocolumbamine	DRD3
Tetrahydrocolumbamine	DRD4
Tetrahydrocolumbamine	DRD5
Tetrahydrocolumbamine	F3
Tetrahydrocolumbamine	HTR1A
Tetrahydrocolumbamine	HTR2A
Tetrahydrocolumbamine	HTR2C
Tetrahydrocolumbamine	HTR3A
Tetrahydrocolumbamine	HTR7
Tetrahydrocolumbamine	IGHG1
Tetrahydrocolumbamine	KCNH2
Tetrahydrocolumbamine	KCNMA1
Tetrahydrocolumbamine	NCOA1
Tetrahydrocolumbamine	OPRD1
Tetrahydrocolumbamine	OPRM1
Tetrahydrocolumbamine	PTGS1
Tetrahydrocolumbamine	PTGS2
Tetrahydrocolumbamine	RXRA
Tetrahydrocolumbamine	RXRB
Tetrahydrocolumbamine	SCN5A
Tetrahydrocolumbamine	SIGMAR1
Tetrahydrocolumbamine	SLC6A2
Tetrahydrocolumbamine	SLC6A3
Tetrahydrocolumbamine	SLC6A4
Tetrahydrocolumbamine	TBXA2R
Tetrahydropalmatine	ABCB1
Tetrahydropalmatine	ADRA1A
Tetrahydropalmatine	ADRA1B
Tetrahydropalmatine	ADRA1D
Tetrahydropalmatine	ADRA2C
Tetrahydropalmatine	ADRB1
Tetrahydropalmatine	ADRB2
Tetrahydropalmatine	CA2
Tetrahydropalmatine	CALM
Tetrahydropalmatine	CHRM1
Tetrahydropalmatine	CHRM2
Tetrahydropalmatine	CHRM3
Tetrahydropalmatine	CHRM4
Tetrahydropalmatine	CHRM5
Tetrahydropalmatine	DRD1
Tetrahydropalmatine	DRD2
Tetrahydropalmatine	DRD3
Tetrahydropalmatine	DRD4
Tetrahydropalmatine	DRD5
Tetrahydropalmatine	F3
Tetrahydropalmatine	HTR1A
[truncated: 179 more rows]
